# Supplementary material for: SETD2 loss sensitizes cells to PI3Kβ and AKT inhibition
Source: PubMed Central journal article supplement (PMC6363018; doi:10.18632/oncotarget.26567), 2019-01-18
Supplement: oncotarget-10-647-s001.pdf [file oncotarget-10-647-s001.pdf]

## SETD2 loss sensitizes cells to PI3K $\beta$ and AKT inhibition

### SUPPLEMENTARY MATERIALS

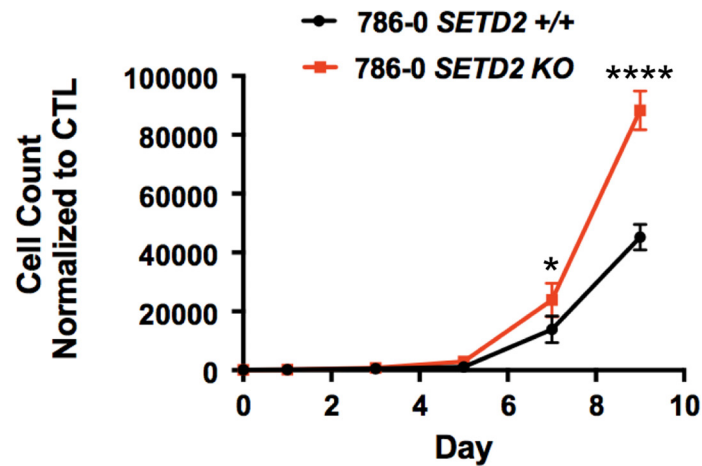

**Supplementary Figure 1: Increased proliferation rate in SETD2 deficient ccRCC-derived cells.** Graph showing proliferation curves for SETD2 proficient (+/+) and SETD2 deficient (KO) 786-0 cells as a function of time (day). Cell count was normalized to control (CTL). \* $P < 0.05$ ; \*\*\*\* $P < 0.0001$ . Standard deviations were calculated and represented for all conditions.

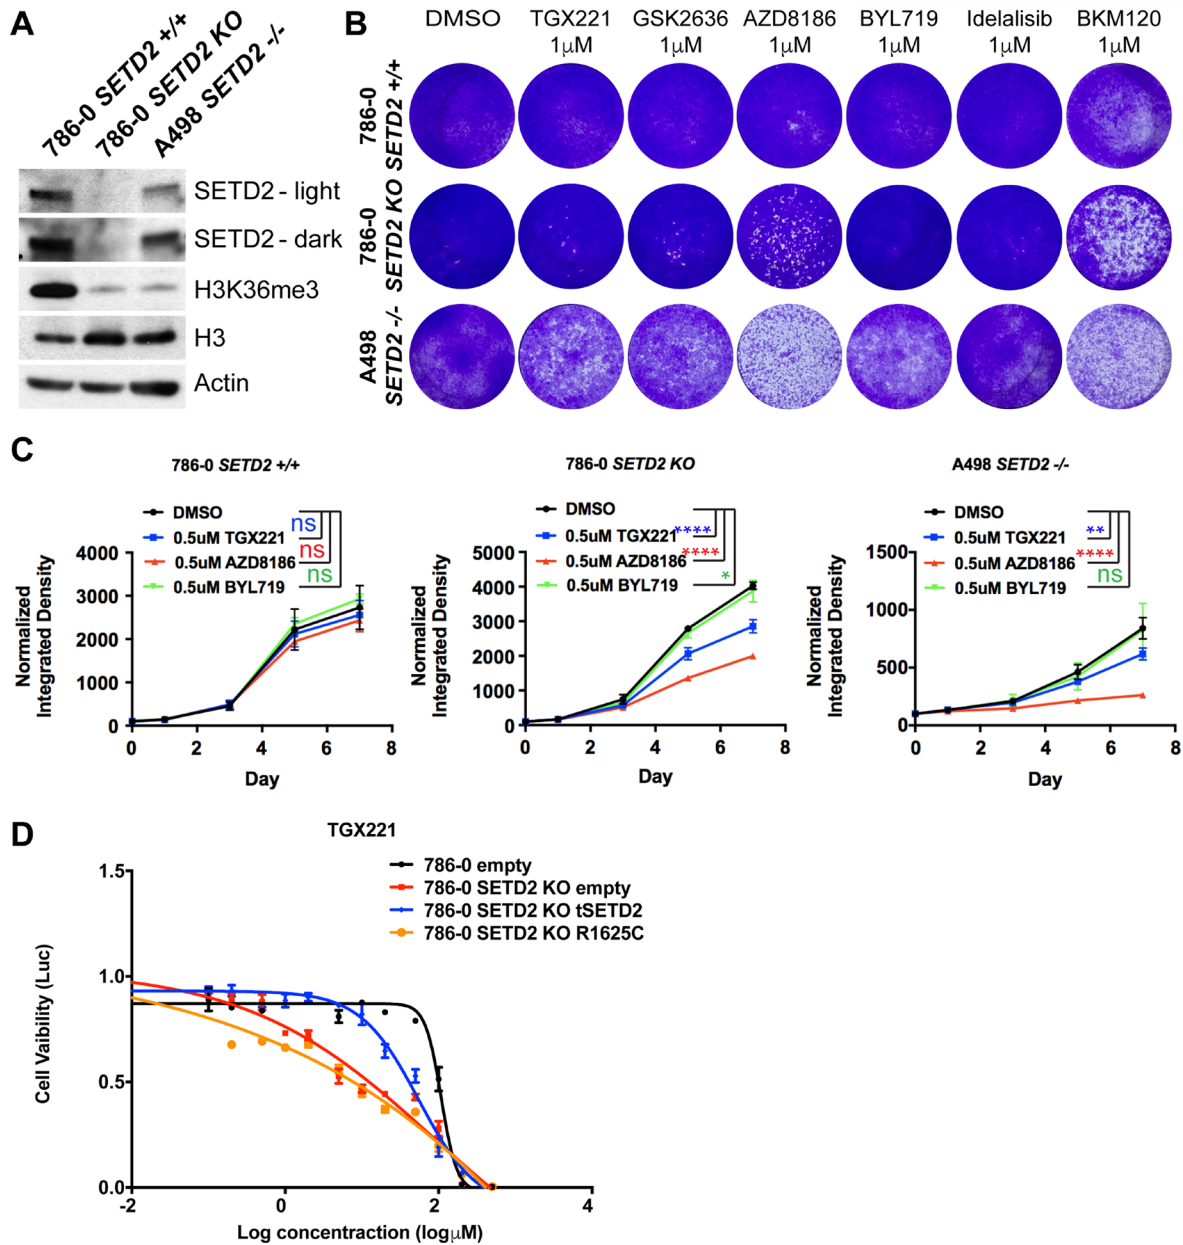

**Supplementary Figure 2: Response of *SETD2* proficient and *SETD2* deficient RCC cell lines to PI3K inhibitors.**

(A) Western blot analysis of indicated proteins showing variations in histone H3 lysine 36 trimethylation (H3K36me3) levels in *SETD2* proficient (+/+) and *SETD2* deficient (KO) 786-0 and (-/-) A498 cells. *SETD2* blotting is shown in two exposures (light and dark). Whole-cell protein lysates from cells grown for 24 hours were resolved by SDS-PAGE. Actin is a loading control. (B) Bright-field microscopy images showing living cells (attached to bottom of well) stained with 0.3% crystal violet solution of *SETD2* (+/+) 786-0 and *SETD2* (KO) 786-0 and (-/-) A498 cells were treated with vehicle (DMSO) or 1  $\mu$ M inhibitor for 10 days. (C) Graphs plotting normalized integrated density calculated from cells stained with 0.3% crystal violet solution as a function of time (day) showing proliferation rates of *SETD2* proficient (+/+) and *SETD2* deficient (KO) 786-0 and (-/-) A498 cells treated with 0.5  $\mu$ M of TGX221 (blue line), AZD8186 (red line), and BYL719 (green line) or DMSO (black line) as control for 7 days. \* $P < 0.05$ ; \*\* $P < 0.005$ ; \*\*\*\* $P < 0.0001$ ; ns, no statistical significance observed. Standard deviations were calculated and represented for all conditions. (D) Cell viability for 786-0 cells treated with a dose titration of TGX221. Genetic modifications to knock out and rescue *SETD2* expression are indicated in the legend, showing increased sensitivity for those cells lacking *SETD2* methylating activity.

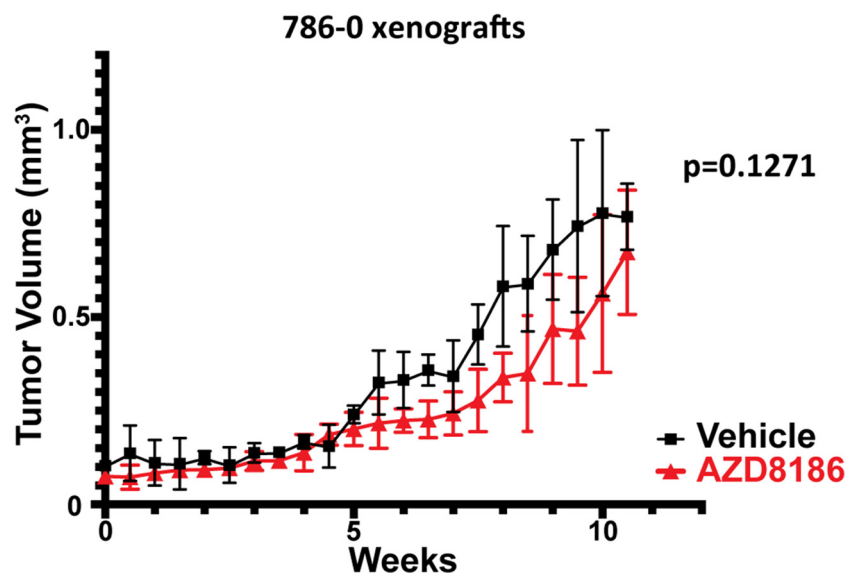

**Supplementary Figure 3: PI3K $\beta$ -specific inhibitor AZD8186 does not significantly change *SETD2* proficient tumor growth *in vivo*.** Graph plotting tumor volume (mm<sup>3</sup>) as a function of time (week) for vehicle-treated (control) and AZD8186-treated tumors. Data are represented by mean  $\pm$  standard deviation.
